# Supplementary material for: Purification of novel antioxidant peptides from myofibrillar protein hydrolysate of chicken breast and their antioxidant potential in chemical and H2O2-stressed cell systems
Source: Royal Society of Chemistry journal article supplement (doi:10.1039/d1fo00579k), 2021-01-01
Supplement: d1fo00579k1.pdf [file d1fo00579k1.pdf]

Supplementary Table S1. List of peptides identified in fraction C by using nano-LC-ESI-MS/MS.

| No. | peptide sequence         | length | charge | mass       | score  | intensity | % of area |
|-----|--------------------------|--------|--------|------------|--------|-----------|-----------|
| 1   | ITTNPYDYHY               | 10     | 2      | 1285.56152 | 124.08 | 1.17E+10  | 26.84     |
| 2   | LRVAPEEHPTL              | 11     | 2      | 1260.68264 | 153.05 | 9.18E+09  | 21.07     |
| 3   | ITTNPYDY                 | 8      | 1      | 985.439277 | 191.63 | 8.48E+09  | 19.47     |
| 4   | IGWSPLGSL                | 9      | 1      | 928.501818 | 209.44 | 8.30E+09  | 19.04     |
| 5   | MQLQKKIKELQA             | 12     | 2      | 1456.84357 | 179.57 | 8.05E+08  | 1.85      |
| 6   | NERFRCPETL               | 10     | 2      | 1320.62447 | 153.24 | 7.16E+08  | 1.64      |
| 7   | FQHRIPEQW                | 10     | 2      | 1367.70985 | 196.88 | 5.22E+08  | 1.20      |
| 8   | ITKQEYDEAGPSIVHRKCF      | 19     | 3      | 2277.1212  | 175.21 | 4.01E+08  | 0.92      |
| 9   | AEEKARREEEDAKRKAEDDLK    | 24     | 4      | 2899.54755 | 110.44 | 3.31E+08  | 0.76      |
| 10  | DRAEQAEADKKAAEERSKQLEDEL | 24     | 4      | 2758.33694 | 119.73 | 3.03E+08  | 0.69      |
| 11  | KIKIAPPER                | 10     | 2      | 1163.73903 | 144.77 | 2.82E+08  | 0.65      |

|    |                     |    |   |            |        |          |      |
|----|---------------------|----|---|------------|--------|----------|------|
| 12 | DTKQPRQYFIG         | 11 | 2 | 1351.68845 | 103.19 | 2.54E+08 | 0.58 |
| 13 | LTYQSEEDRKNVLR      | 15 | 3 | 1862.98503 | 81.311 | 2.18E+08 | 0.50 |
| 14 | FQKPKPGKGKAEAHF     | 15 | 4 | 1668.91001 | 83.869 | 1.93E+08 | 0.44 |
| 15 | NVIGPWIQTKM         | 11 | 2 | 1285.68528 | 90.15  | 1.74E+08 | 0.40 |
| 16 | LRKKHADSTAEL        | 12 | 2 | 1367.75211 | 116.3  | 1.46E+08 | 0.33 |
| 17 | IDRCEVGTTHWTQC      | 14 | 3 | 1761.75629 | 88.73  | 1.15E+08 | 0.26 |
| 18 | VVKVLDTPGPPSHVTTKD  | 18 | 3 | 1889.02583 | 112.55 | 8.20E+07 | 0.19 |
| 19 | LRLKKKMEGDLNEME     | 15 | 2 | 1832.94884 | 169.62 | 7.46E+07 | 0.17 |
| 20 | EIKAKNALAHAL        | 12 | 2 | 1277.74557 | 110.41 | 7.27E+07 | 0.17 |
| 21 | LKTAIGKAGYSDKVVIG   | 17 | 2 | 1718.99307 | 140.33 | 6.57E+07 | 0.15 |
| 22 | LDDLQKLKQRL         | 11 | 2 | 1368.8089  | 185.6  | 5.96E+07 | 0.14 |
| 23 | AVKASEPPLPPGKVTL    | 16 | 2 | 1602.93449 | 124.51 | 5.07E+07 | 0.12 |
| 24 | SEIKTKEEEHQRMINDVNA | 19 | 3 | 2270.09611 | 88.574 | 4.86E+07 | 0.11 |

|    |                    |    |   |            |        |          |      |
|----|--------------------|----|---|------------|--------|----------|------|
| 25 | VLDPDGKGSIKKSF     | 14 | 2 | 1489.81404 | 126.34 | 4.18E+07 | 0.10 |
| 26 | EASQKESRSLSTEL     | 14 | 2 | 1563.77403 | 108.53 | 4.04E+07 | 0.09 |
| 27 | LKEQTDQHRIPKEQW    | 16 | 2 | 2082.06467 | 151.56 | 3.42E+07 | 0.08 |
| 28 | VMSGGTTMYPGIADR    | 15 | 2 | 1554.71705 | 87.001 | 2.90E+07 | 0.07 |
| 29 | AVLDETIK           | 9  | 1 | 958.533512 | 152.63 | 2.68E+07 | 0.06 |
| 30 | SKEGGKVTVKTEGGETL  | 17 | 2 | 1718.90504 | 220.76 | 2.52E+07 | 0.06 |
| 31 | EARNAEEKAKKAITDA   | 16 | 2 | 1743.91153 | 151.74 | 2.11E+07 | 0.05 |
| 32 | QVHDIPGPPTGPIKF    | 15 | 2 | 1601.85658 | 142.97 | 1.83E+07 | 0.04 |
| 33 | VQCNDAPVKICKYPVTGL | 18 | 2 | 2061.03872 | 125.53 | 1.71E+07 | 0.04 |
| 34 | SLINTKKKLETDIVQ    | 15 | 2 | 1728.99855 | 89.266 | 1.54E+07 | 0.04 |
| 35 | ESAGIHETTYNS       | 12 | 2 | 1307.56297 | 107.47 | 1.50E+07 | 0.03 |
| 36 | PVVAQYPYKEPGPPGTPF | 18 | 2 | 1942.9829  | 100.88 | 1.49E+07 | 0.03 |
| 37 | YDQHLGKSNNFQKPKPAK | 18 | 2 | 2099.09122 | 150.12 | 1.47E+07 | 0.03 |

|    |                      |    |   |            |        |          |      |
|----|----------------------|----|---|------------|--------|----------|------|
| 38 | GKVTVKTEGGETL        | 13 | 2 | 1317.714   | 159.09 | 1.46E+07 | 0.03 |
| 39 | LLITTPYDYHY          | 12 | 2 | 1511.72965 | 121.25 | 1.45E+07 | 0.03 |
| 40 | NISGWLDKNKD          | 11 | 2 | 1288.64116 | 86.882 | 1.45E+07 | 0.03 |
| 41 | IVRALGQNPTNAEIN      | 15 | 2 | 1608.85837 | 88.155 | 1.44E+07 | 0.03 |
| 42 | ALIHRHRPDLID         | 12 | 2 | 1454.81063 | 86.67  | 1.43E+07 | 0.03 |
| 43 | AWAPPLHDGGSSISHY     | 16 | 2 | 1693.78487 | 79.489 | 1.42E+07 | 0.03 |
| 44 | NQQLDTKQPRQYF        | 13 | 2 | 1664.82707 | 102.06 | 1.40E+07 | 0.03 |
| 45 | MQLQKKIKEL           | 10 | 2 | 1257.74788 | 122.52 | 1.37E+07 | 0.03 |
| 46 | NLQQEIADL            | 9  | 1 | 1042.52949 | 132.08 | 1.36E+07 | 0.03 |
| 47 | SLEHEEGKILR          | 11 | 2 | 1309.69901 | 140.17 | 1.36E+07 | 0.03 |
| 48 | KVEIPVSGKPLPKVT      | 15 | 2 | 1590.97088 | 92.457 | 1.36E+07 | 0.03 |
| 49 | SVVANYPFKVPGPPGTPQVI | 20 | 2 | 2066.12006 | 86.803 | 1.35E+07 | 0.03 |
| 50 | EIKAKNALAHALQSA      | 15 | 2 | 1563.87329 | 122.46 | 1.35E+07 | 0.03 |

|    |                     |    |   |            |        |          |      |
|----|---------------------|----|---|------------|--------|----------|------|
| 51 | MQQGGAPTPFDRNF      | 14 | 2 | 1564.70926 | 104.82 | 1.35E+07 | 0.03 |
| 52 | LGSIDIDHTQYKFGHTK   | 17 | 2 | 1958.98503 | 116.51 | 1.34E+07 | 0.03 |
| 53 | LKRHLEEEIKAKNALAHA  | 18 | 4 | 2070.16981 | 91.457 | 1.34E+07 | 0.03 |
| 54 | MQAKGSEKWSEC        | 12 | 2 | 1439.61733 | 88.056 | 1.32E+07 | 0.03 |
| 55 | AEASLEHEEGKILRL     | 15 | 2 | 1693.8999  | 103.2  | 1.31E+07 | 0.03 |
| 56 | KALPTGYSLPKDTPGFQ   | 17 | 2 | 1818.9516  | 101.62 | 1.31E+07 | 0.03 |
| 57 | VVQWNEPVNDGGSK      | 14 | 2 | 1527.73177 | 103.34 | 1.31E+07 | 0.03 |
| 58 | PIFLPSPPSKP         | 11 | 2 | 1178.66995 | 92.439 | 1.30E+07 | 0.03 |
| 59 | VIKHTEPVPDPRAVNQ    | 16 | 2 | 1798.96898 | 98.156 | 1.28E+07 | 0.03 |
| 60 | VPGVGVPGVG          | 10 | 1 | 836.475603 | 109.88 | 1.28E+07 | 0.03 |
| 61 | EEAEASLEHEEGKILRLQL | 19 | 3 | 2193.12773 | 100.35 | 1.28E+07 | 0.03 |
| 62 | IITNWDDMEKIWHHTF    | 16 | 3 | 2084.97783 | 103.21 | 1.27E+07 | 0.03 |
| 63 | DCRKNVLGHMQQ        | 12 | 2 | 1484.69765 | 113.69 | 1.25E+07 | 0.03 |

|    |                        |    |   |            |        |          |      |
|----|------------------------|----|---|------------|--------|----------|------|
| 64 | KVEDIHAGKYRF           | 12 | 3 | 1461.77285 | 130.1  | 1.24E+07 | 0.03 |
| 65 | IQLKEAKHIAEE           | 12 | 2 | 1407.77218 | 149.49 | 1.24E+07 | 0.03 |
| 66 | QASLEEAEEASLEHEEGKILRL | 21 | 3 | 2351.19687 | 97.457 | 1.24E+07 | 0.03 |
| 67 | YPYKVPGPPGTPF          | 13 | 2 | 1418.72344 | 100.02 | 1.23E+07 | 0.03 |
| 68 | LTEAPLNPKANREKMT       | 16 | 2 | 1811.95637 | 80.69  | 1.23E+07 | 0.03 |
| 69 | IEELKRHLEE             | 10 | 3 | 1294.68811 | 102.06 | 1.23E+07 | 0.03 |
| 70 | EINKILGNPSKEEMN        | 15 | 2 | 1714.85598 | 109.24 | 1.22E+07 | 0.03 |
| 71 | ITKQEYDEAGP            | 11 | 2 | 1249.58265 | 81.594 | 1.22E+07 | 0.03 |
| 72 | EEAKKKLAQRLQD          | 13 | 2 | 1555.8682  | 132.32 | 1.20E+07 | 0.03 |
| 73 | LEGEVDSEQKRSAAVKGVR    | 20 | 3 | 2186.12912 | 142.3  | 1.20E+07 | 0.03 |
| 74 | DDMEKIWHHT             | 10 | 2 | 1310.57137 | 118.5  | 1.12E+07 | 0.03 |
| 75 | ASLEHEEGKILRLQL        | 15 | 2 | 1734.96283 | 84.718 | 1.11E+07 | 0.03 |
| 76 | IHIMPDTPEITL           | 12 | 2 | 1378.71664 | 82.452 | 1.09E+07 | 0.03 |

|    |                       |    |   |            |        |          |      |
|----|-----------------------|----|---|------------|--------|----------|------|
| 77 | RKGIVVRAGGSA          | 12 | 3 | 1169.69929 | 103.21 | 1.08E+07 | 0.02 |
| 78 | ANVIGPWIQTKM          | 12 | 1 | 1356.72239 | 99.815 | 1.08E+07 | 0.02 |
| 79 | RKIAEKDEEIDQL         | 13 | 2 | 1585.83115 | 86.014 | 1.07E+07 | 0.02 |
| 80 | AKVEKEKHATENKVKNLTEEM | 21 | 2 | 2471.26899 | 82.102 | 1.07E+07 | 0.02 |
| 81 | AEADSLADAEERCDDL      | 16 | 2 | 1791.75812 | 87.719 | 1.05E+07 | 0.02 |
| 82 | FHLSWKDGLGL           | 11 | 1 | 1271.66626 | 144.77 | 1.03E+07 | 0.02 |
| 83 | PIFLPSPSKPKIMD        | 15 | 2 | 1665.9164  | 85.958 | 1.01E+07 | 0.02 |
| 84 | NAEEKAKKAITDA         | 13 | 2 | 1387.73071 | 138.45 | 9.94E+06 | 0.02 |
| 85 | SWDPPDYTGGCQ          | 12 | 2 | 1381.52448 | 102.06 | 9.83E+06 | 0.02 |
| 86 | TDFQHRIPEQW           | 12 | 2 | 1583.78447 | 107.03 | 9.76E+06 | 0.02 |
| 87 | IKWEKPESDGGSKITGY     | 17 | 2 | 1893.94724 | 93.766 | 9.55E+06 | 0.02 |
| 88 | LVIIEGDLERAEE         | 13 | 2 | 1484.77224 | 85.256 | 9.18E+06 | 0.02 |
| 89 | VKALDPFTVPSPTSL       | 16 | 2 | 1667.91342 | 81.525 | 8.78E+06 | 0.02 |

|    |                     |    |   |            |        |          |      |
|----|---------------------|----|---|------------|--------|----------|------|
| 90 | NTIVVVAGNKVRL       | 13 | 2 | 1381.84053 | 81.865 | 8.16E+06 | 0.02 |
| 91 | QVQAEADSLADAEERCDDL | 19 | 2 | 2146.94369 | 77.912 | 8.12E+06 | 0.02 |
| 92 | AVRSTVRIGL          | 10 | 3 | 1070.65603 | 100.69 | 8.10E+06 | 0.02 |
| 93 | IHIMPDTPEITL        | 12 | 1 | 1378.71664 | 131.06 | 7.75E+06 | 0.02 |
| 94 | VITVQVHDIPGPPTGPIKF | 19 | 2 | 2014.12515 | 64.675 | 7.57E+06 | 0.02 |
| 95 | AEKAADESERGMKVIEN   | 17 | 2 | 1875.89964 | 117.07 | 6.44E+06 | 0.01 |
| 96 | PFKLPGPPGTPF        | 12 | 1 | 1253.68084 | 97.431 | 5.53E+06 | 0.01 |
| 97 | PFTVPSPTSL          | 11 | 2 | 1141.60193 | 102.72 | 4.47E+06 | 0.01 |
